# Supplementary material for: Prioritization of Susceptibility Genes for Ectopic Pregnancy by Gene Network Analysis
Source: Int J Mol Sci. 2016 Feb 1;17(2):191. doi: 10.3390/ijms17020191 (PMC4783925; doi:10.3390/ijms17020191)
Supplement: Supplementary file 1 [file ijms-17-00191-s001.xlsx]

## Sheet: Table S1
Table S1. The complete list of ectopic pregnancy susceptibility genes.
Gene_Name	Gene_ID	Gene_Description	Pubmed_Count	PMIDs	TM-rank	TM-rank (z-test)	Network_Degree
VEGFA	7422	vascular endothelial growth factor A	21	24597240;15066471;15302276;23687977;11111878;21343760;15374715;25551960;12564169;12456629;10593373;20015329;23421942;11821301;25918593;25577466;16055453;20004374;18925333;23793551;24523985	0.98909	0	44
IL8	3576	interleukin 8	9	12749440;22386127;21848430;17893134;17614966;23546865;12634636;9920091;26372530	0.38012	5.47832e-06	31
IL6	3569	interleukin 6 (interferon, beta 2)	5	21848430;26372530;24179692;12749440;9169748	0.33978	5.1467e-05	51
ESR1	2099	estrogen receptor 1	9	1633898;22937205;24427327;23687977;19864448;16763010;23238960;23573357;19211805	0.33905	5.3472e-05	24
EGFR	1956	epidermal growth factor receptor (erythroblastic leukemia viral (v-erb-b) oncogene homolog, avian)	5	24084529;23872290;12889991;2701167;23288908	0.23342	0.00572156	33
IL10	3586	interleukin 10	6	19380797;17614966;21848430;9169748;21077528;26372530	0.17413	0.0380569	18
TNF	7124	tumor necrosis factor (TNF superfamily, member 2)	7	21848430;18489796;23546865;12749440;10100774;12634636;8987949	0.16857	0.0442956	20
IL1B	3553	interleukin 1, beta	4	18025098;21848430;23546865;16275248	0.1576	0.0590084	27
TP53	7157	tumor protein p53	2	24901398;19514598	0.15597	0.0614893	44
ERBB2	2064	v-erb-b2 erythroblastic leukemia viral oncogene homolog 2, neuro/glioblastoma derived oncogene homolog (avian)	4	19514598;9158311;12889991;18201867	0.15311	0.0660383	22
MUC1	4582	mucin 1, cell surface associated	4	9100755;17678912;22425195;19561343	0.14771	0.0753329	6
INS	3630	insulin	3	1477996;12266611;9926592	0.14724	0.0761868	32
MMP9	4318	matrix metallopeptidase 9 (gelatinase B, 92kDa gelatinase, 92kDa type IV collagenase)	3	11425330;21644936;15615902	0.14573	0.0789802	32
TGFB1	7040	transforming growth factor, beta 1	3	1537318;19380797;1569174	0.14083	0.0885796	34
BCL2	596	B-cell CLL/lymphoma 2	3	24586750;11387307;10221250	0.14023	0.0898123	28
PTGS2	5743	prostaglandin-endoperoxide synthase 2 (prostaglandin G/H synthase and cyclooxygenase)	6	19109220;20427758;25753567;23108348;25388530;9920091	0.1325	0.10685	13
MUC16	94025	mucin 16, cell surface associated	22	9614415;3456253;12564169;10689006;10883946;22215199;3475378;2481686;10337071;19514598;2399775;16882269;22496937;16303230;8512347;11451543;2351224;23830901;17031874;18925333;26351313;10228907	0.13124	0.109835	1
FN1	2335	fibronectin 1	6	12216430;23826180;12968946;2196556;11854653;15186930	0.119	0.141971	17
CD8A	925	CD8a molecule	6	17141879;10221250;16763010;14669403;21414667;16635211	0.11859	0.143148	11
MMP2	4313	matrix metallopeptidase 2 (gelatinase A, 72kDa gelatinase, 72kDa type IV collagenase)	3	16375819;21644936;15615902	0.11041	0.168001	27
PGR	5241	progesterone receptor	8	3063028;3069266;9107115;9080204;2189395;1894013;19864448;1633898	0.10959	0.170637	9
NOS3	4846	nitric oxide synthase 3 (endothelial cell)	3	24799858;25546387;16375819	0.10275	0.193648	22
MAPK1	5594	mitogen-activated protein kinase 1	3	23546865;25999259;17893134	0.10139	0.198439	28
IL4	3565	interleukin 4	4	9169748;18489796;21172564;20408833	0.095498	0.220009	16
CTNNB1	1499	catenin (cadherin-associated protein), beta 1, 88kDa	2	21858178;23787212	0.094246	0.22476	35
IL2	3558	interleukin 2	2	9169748;2527515	0.090991	0.23738	30
AGT	183	angiotensinogen (serpin peptidase inhibitor, clade A, member 8)	3	7957971;9024237;9237079	0.090256	0.240282	20
NOS2	4843	nitric oxide synthase 2, inducible	10	16375819;20647263;19692623;22425195;25388530;19482272;25546387;20427758;19109220;23687977	0.083989	0.265798	6
TLR2	7097	toll-like receptor 2	4	21827822;21224062;17785841;23546865	0.082985	0.270009	14
MAPK14	1432	mitogen-activated protein kinase 14	2	23546865;17614966	0.081822	0.274929	28
HSPD1	3329	heat shock 60kDa protein 1 (chaperonin)	7	24684032;9619577;20956570;10231012;12473287;22386127;17280761	0.07315	0.312946	7
IGF1	3479	insulin-like growth factor 1 (somatomedin C)	1	16373405	0.072946	0.313867	36
SRC	6714	v-src sarcoma (Schmidt-Ruppin A-2) viral oncogene homolog (avian)	1	23285066	0.071511	0.320378	48
NCAM1	4684	neural cell adhesion molecule 1	8	16635211;16427139;22002546;17717421;21414667;14669403;20408833;9920091	0.070215	0.326307	5
CDH1	999	cadherin 1, type 1, E-cadherin (epithelial)	3	23787212;16375819;18385125	0.067855	0.337215	24
TIMP1	7076	TIMP metallopeptidase inhibitor 1	2	15615902;21644936	0.06721	0.340221	23
STAT3	6774	signal transducer and activator of transcription 3 (acute-phase response factor)	1	24074901	0.065734	0.347138	45
PRL	5617	prolactin	8	15656219;4054349;18381568;7014715;21858178;23148678;2446439;7684741	0.064883	0.351149	4
PIK3CA	5290	phosphoinositide-3-kinase, catalytic, alpha polypeptide	1	25690695	0.062916	0.360483	43
ALB	213	albumin	2	11925391;11789757	0.061966	0.365022	24
AKT1	207	v-akt murine thymoma viral oncogene homolog 1	1	16373405	0.060049	0.374238	43
LIF	3976	leukemia inhibitory factor (cholinergic differentiation factor)	10	16545901;24074901;9526705;23687977;20228378;15167855;15705400;21077528;18468598;18258286	0.059718	0.375836	4
CD4	920	CD4 molecule	5	14669403;14672471;21414667;20923543;16635211	0.059392	0.377413	7
MMP14	4323	matrix metallopeptidase 14 (membrane-inserted)	3	21644936;11228247;15615902	0.058639	0.381063	10
FOXP3	50943	forkhead box P3	2	22002546;19380797	0.057805	0.385117	19
KDR	3791	kinase insert domain receptor (a type III receptor tyrosine kinase)	2	15374715;25918593	0.056029	0.393793	21
IL1A	3552	interleukin 1, alpha	6	21827822;22386127;26279136;8987949;12634636;10770206	0.055938	0.394239	6
KIT	3815	v-kit Hardy-Zuckerman 4 feline sarcoma viral oncogene homolog	2	19109220;23700252	0.052197	0.412686	16
FLT1	2321	fms-related tyrosine kinase 1 (vascular endothelial growth factor/vascular permeability factor receptor)	3	25918593;21715541;15374715	0.05091	0.41908	11
POMC	5443	proopiomelanocortin	2	2676767;2950761	0.050094	0.423145	17
IGF2	3481	insulin-like growth factor 2 (somatomedin A)	1	25935785	0.049614	0.42554	19
CNR1	1268	cannabinoid receptor 1 (brain)	4	23687977;15378054;22701012;19093002	0.048987	0.428673	8
TLR4	7099	toll-like receptor 4	2	21224062;16859562	0.048175	0.432736	15
NFKB1	4790	nuclear factor of kappa light polypeptide gene enhancer in B-cells 1	1	9158311	0.046213	0.442584	38
REN	5972	renin	6	9237079;1991543;9024237;7957971;1517384;12266611	0.045232	0.447521	4
IL2RA	3559	interleukin 2 receptor, alpha	3	20923543;12749440;17717421	0.044926	0.449063	11
PGF	5228	placental growth factor	3	23421942;21715541;21047920	0.042239	0.462632	6
A2M	2	alpha-2-macroglobulin	2	15909710;23105785	0.041897	0.464362	15
BRCA1	672	breast cancer 1, early onset	3	19514598;11091985;21131840	0.038678	0.480679	6
LEP	3952	leptin	1	21483996	0.036078	0.493883	18
PAPPA	5069	pregnancy-associated plasma protein A, pappalysin 1	10	10672717;16055453;6084476;2445774;15066471;6194016;2481686;7504682;2420432;2444473	0.034855	0.500098	2
IFNG	3458	interferon, gamma	3	15070879;18489796;2115786	0.033285	0.508075	9
STAT1	6772	signal transducer and activator of transcription 1, 91kDa	1	15070879	0.032667	0.511214	30
ANGPT2	285	angiopoietin 2	2	23099117;9237079	0.031672	0.516267	9
PSG1	5669	pregnancy specific beta-1-glycoprotein 1	13	2050251;2446439;6968160;2364798;2903089;6980011;6972332;7025764;10672717;2420432;2466708;7008155;6460498	0.031113	0.519104	0
ADM	133	adrenomedullin	4	23663996;22456622;20444935;23745703	0.030655	0.521429	5
CD69	969	CD69 molecule	2	16427139;17717421	0.030497	0.52223	7
EGF	1950	epidermal growth factor (beta-urogastrone)	1	2701167	0.030138	0.524051	22
LIFR	3977	leukemia inhibitory factor receptor alpha	2	25790555;24074901	0.030101	0.524239	4
CSF2	1437	colony stimulating factor 2 (granulocyte-macrophage)	1	8547489	0.02981	0.525715	23
VCAM1	7412	vascular cell adhesion molecule 1	1	10735600	0.02966	0.526475	14
ITGB1	3688	integrin, beta 1 (fibronectin receptor, beta polypeptide, antigen CD29 includes MDF2, MSK12)	1	15186930	0.029524	0.527165	21
PTPRC	5788	protein tyrosine phosphatase, receptor type, C	2	17141879;21414667	0.028971	0.529968	8
SERPINE1	5054	serpin peptidase inhibitor, clade E (nexin, plasminogen activator inhibitor type 1), member 1	1	25842749	0.028651	0.531589	20
ADAM12	8038	ADAM metallopeptidase domain 12	5	23421942;21277576;24830297;21142075;22927907	0.02848	0.532455	4
CRP	1401	C-reactive protein, pentraxin-related	4	3704857;3435185;21180100;24680394	0.027688	0.536464	3
VHL	7428	von Hippel-Lindau tumor suppressor	2	24359042;22714833	0.027008	0.539904	3
PLAU	5328	plasminogen activator, urokinase	2	10527826;11425330	0.026202	0.543977	12
CASP1	834	caspase 1, apoptosis-related cysteine peptidase (interleukin 1, beta, convertase)	2	18025098;20023297	0.02556	0.547217	10
PROKR1	10887	prokineticin receptor 1	3	20047737;21224062;20864676	0.025051	0.549785	5
IGFBP1	3484	insulin-like growth factor binding protein 1	5	12889991;18381568;2369152;21858178;25935785	0.023902	0.555572	3
CASP3	836	caspase 3, apoptosis-related cysteine peptidase	1	21239439	0.023768	0.556246	16
AFP	174	alpha-fetoprotein	7	2481685;7687757;6188510;2458628;9668715;1700118;7682316	0.023742	0.556377	1
S1PR1	1901	sphingosine-1-phosphate receptor 1	1	23881382	0.02374	0.556387	13
CCL2	6347	chemokine (C-C motif) ligand 2	1	9920091	0.023086	0.559675	11
SLIT2	9353	slit homolog 2 (Drosophila)	2	26282852;20651036	0.022849	0.560866	6
VWF	7450	von Willebrand factor	1	23444764	0.022249	0.563877	13
ROBO1	6091	roundabout, axon guidance receptor, homolog 1 (Drosophila)	2	20651036;26282852	0.022024	0.565005	6
PAEP	5047	progestagen-associated endometrial protein	9	2031903;1730302;12781411;8288762;1551949;16055453;7947525;15066471;7498715	0.02154	0.567431	0
ANGPT1	284	angiopoietin 1	1	23099117	0.0215	0.567631	14
MMP7	4316	matrix metallopeptidase 7 (matrilysin, uterine)	2	10770206;21858178	0.021471	0.567776	9
TGFB2	7042	transforming growth factor, beta 2	1	1537318	0.020777	0.571249	12
IL11	3589	interleukin 11	2	21077528;15465850	0.020727	0.571499	7
IL6ST	3572	interleukin 6 signal transducer (gp130, oncostatin M receptor)	1	24179692	0.0196	0.577126	9
F2	2147	coagulation factor II (thrombin)	1	11883214	0.019342	0.578412	17
CDC42	998	cell division cycle 42 (GTP binding protein, 25kDa)	1	25690695	0.018977	0.58023	17
BYSL	705	bystin-like	1	14633596	0.018493	0.582638	2
FOXJ1	2302	forkhead box J1	1	23009827	0.018493	0.582638	1
RFX3	5991	regulatory factor X, 3 (influences HLA class II expression)	1	23009827	0.018493	0.582638	1
TRO	7216	trophinin	1	14633596	0.018493	0.582638	2
TROAP	10024	trophinin associated protein (tastin)	1	14633596	0.018493	0.582638	2
TLR9	54106	toll-like receptor 9	2	16859562;18412774	0.018375	0.583224	4
PROK1	84432	prokineticin 1	2	21858178;20864676	0.018352	0.583339	5
PROKR2	128674	prokineticin receptor 2	2	21224062;20047737	0.018352	0.583339	5
FST	10468	follistatin	5	25421645;24222717;19692623;20228378;17971430	0.018097	0.584606	1
CYP19A1	1588	cytochrome P450, family 19, subfamily A, polypeptide 1	2	7684741;15695975	0.017639	0.586879	3
ACTA1	58	actin, alpha 1, skeletal muscle	1	15168331	0.017319	0.588466	11
IL18	3606	interleukin 18 (interferon-gamma-inducing factor)	1	18025098	0.016928	0.590402	8
C1QA	712	complement component 1, q subcomponent, A chain	2	23401701;23703617	0.016839	0.590843	1
CDKN1C	1028	cyclin-dependent kinase inhibitor 1C (p57, Kip2)	4	17365825;25837656;25552136;24428592	0.016156	0.594219	2
C3	718	complement component 3	1	25356154	0.01557	0.597111	8
HSPE1	3336	heat shock 10kDa protein 1 (chaperonin 10)	2	2463715;10231012	0.015401	0.597944	1
IL1RN	3557	interleukin 1 receptor antagonist	2	26279136;17614966	0.015084	0.599505	3
IL17A	3605	interleukin 17A	1	23013312	0.014907	0.600376	9
BDNF	627	brain-derived neurotrophic factor	1	21239439	0.014871	0.600553	13
ESR2	2100	estrogen receptor 2 (ER beta)	1	16763010	0.014703	0.60138	7
CD68	968	CD68 molecule	6	21414667;9920091;10486472;23108348;17141879;16635211	0.01436	0.603065	0
INHA	3623	inhibin, alpha	6	21343760;19549702;9756316;19711741;19079962;22921576	0.01436	0.603065	0
PRLR	5618	prolactin receptor	1	8960687	0.014051	0.604582	4
HSPB1	3315	heat shock 27kDa protein 1	1	23234035	0.013695	0.606327	10
SELL	6402	selectin L	1	24829027	0.013635	0.606621	5
SLIT1	6585	slit homolog 1 (Drosophila)	1	20651036	0.013302	0.608251	6
NRP1	8829	neuropilin 1	1	19380797	0.013266	0.608427	4
CCND3	896	cyclin D3	1	9619571	0.013215	0.608677	5
TIMP2	7077	TIMP metallopeptidase inhibitor 2	2	21644936;15615902	0.012874	0.610344	4
GHR	2690	growth hormone receptor	1	25542184	0.012539	0.61198	8
CSF3	1440	colony stimulating factor 3 (granulocyte)	2	22889306;23081869	0.012372	0.612794	3
SLIT3	6586	slit homolog 3 (Drosophila)	1	20651036	0.012181	0.613725	5
VIM	7431	vimentin	2	9100755;25388530	0.01215	0.613876	3
DHFR	1719	dihydrofolate reductase	1	22434686	0.011733	0.615907	2
CD14	929	CD14 molecule	1	16859562	0.011691	0.616111	5
MYB	4602	v-myb myeloblastosis viral oncogene homolog (avian)	1	19514598	0.011688	0.616126	5
FCGR3A	2214	Fc fragment of IgG, low affinity IIIa, receptor (CD16a)	4	16635211;21414667;20408833;14669403	0.01153	0.616894	1
CNR2	1269	cannabinoid receptor 2 (macrophage)	1	22701012	0.011395	0.61755	6
IL6R	3570	interleukin 6 receptor	1	24179692	0.011133	0.618823	7
PLAUR	5329	plasminogen activator, urokinase receptor	1	10527826	0.01106	0.619177	8
TNFSF10	8743	tumor necrosis factor (ligand) superfamily, member 10	2	20408833;23290504	0.011009	0.619425	3
NOS1	4842	nitric oxide synthase 1 (neuronal)	1	25546387	0.010914	0.619885	4
EPO	2056	erythropoietin	2	19281751;9949221	0.010892	0.619992	5
EPOR	2057	erythropoietin receptor	1	9949221	0.01046	0.622085	10
ROBO2	6092	roundabout, axon guidance receptor, homolog 2 (Drosophila)	1	20651036	0.010433	0.622216	4
TLR1	7096	toll-like receptor 1	1	18412774	0.01028	0.622957	3
PROK2	60675	prokineticin 2	1	20047737	0.0099836	0.62439	5
IL15	3600	interleukin 15	3	23401701;21172564;20408833	0.0098805	0.624888	1
CDH5	1003	cadherin 5, type 2 (vascular endothelium)	1	16375819	0.0096474	0.626013	6
PI3	5266	peptidase inhibitor 3, skin-derived	4	14641912;18456670;19095674;25356943	0.0095733	0.626371	0
CTBP1	1487	C-terminal binding protein 1	1	26377223	0.0094903	0.626771	5
IL13	3596	interleukin 13	1	18489796	0.0094061	0.627177	7
DKK1	22943	dickkopf homolog 1 (Xenopus laevis)	1	21858178	0.0092933	0.627721	5
TYMS	7298	thymidylate synthetase	1	25661493	0.0092647	0.627858	2
IL1R1	3554	interleukin 1 receptor, type I	1	16275248	0.0090638	0.628826	5
FAAH	2166	fatty acid amide hydrolase	2	23372171;22701012	0.0090514	0.628886	1
ADM2	79924	adrenomedullin 2	1	23745703	0.0087524	0.630324	4
CRHR2	1395	corticotropin releasing hormone receptor 2	1	20978183	0.0087524	0.630324	4
LHCGR	3973	luteinizing hormone/choriogonadotropin receptor	1	25999259	0.0087524	0.630324	4
CFTR	1080	cystic fibrosis transmembrane conductance regulator (ATP-binding cassette sub-family C, member 7)	2	24559724;19012687	0.0086873	0.630637	2
NOD2	64127	nucleotide-binding oligomerization domain containing 2	1	16859562	0.0086525	0.630804	4
KLRD1	3824	killer cell lectin-like receptor subfamily D, member 1	1	20408833	0.0085288	0.631399	2
SPP1	6696	secreted phosphoprotein 1	1	22002573	0.0083917	0.632057	7
ROBO3	64221	roundabout, axon guidance receptor, homolog 3 (Drosophila)	1	20651036	0.0080367	0.63376	3
EIF3A	8661	eukaryotic translation initiation factor 3, subunit A	1	9158311	0.0078465	0.634671	3
WNT3A	89780	wingless-type MMTV integration site family, member 3A	1	21968811	0.007602	0.635841	4
TFRC	7037	transferrin receptor (p90, CD71)	1	2701167	0.0074841	0.636405	5
LGALS3	3958	lectin, galactoside-binding, soluble, 3	1	26359845	0.0074785	0.636432	4
TIMP3	7078	TIMP metallopeptidase inhibitor 3	1	21644936	0.0074355	0.636637	5
OLFM1	10439	olfactomedin 1	3	21968811;25999259;26377223	0.00718	0.637858	0
SLPI	6590	secretory leukocyte peptidase inhibitor	3	25356943;18456670;19095674	0.00718	0.637858	0
TGFA	7039	transforming growth factor, alpha	1	1569174	0.0070699	0.638384	3
MB	4151	myoglobin	1	11719740	0.0070676	0.638395	2
NANOG	79923	Nanog homeobox	1	23285066	0.006946	0.638975	5
CSH1	1442	chorionic somatomammotropin hormone 1 (placental lactogen)	2	21858178;2466704	0.0068254	0.63955	1
DICER1	23405	dicer 1, ribonuclease type III	2	20023297;24427327	0.0067834	0.63975	1
TLR3	7098	toll-like receptor 3	1	18412774	0.006569	0.640772	5
IFNA1	3439	interferon, alpha 1	1	2115786	0.0064827	0.641182	4
MTHFR	4524	5,10-methylenetetrahydrofolate reductase (NADPH)	1	14691342	0.0064262	0.641451	1
MMP3	4314	matrix metallopeptidase 3 (stromelysin 1, progelatinase)	1	10770206	0.0063358	0.641881	4
HSD3B1	3283	hydroxy-delta-5-steroid dehydrogenase, 3 beta- and steroid delta-isomerase 1	1	12858014	0.006242	0.642327	3
SCGB1A1	7356	secretoglobin, family 1A, member 1 (uteroglobin)	1	17531233	0.0060628	0.643179	1
CD83	9308	CD83 molecule	1	21172564	0.0060543	0.643219	2
BAD	572	BCL2-associated agonist of cell death	1	24586750	0.0059631	0.643653	4
DES	1674	desmin	1	24427372	0.0059193	0.64386	1
CDKN2A	1029	cyclin-dependent kinase inhibitor 2A (melanoma, p16, inhibits CDK4)	1	12889991	0.0057549	0.644641	4
LNPEP	4012	leucyl/cystinyl aminopeptidase	2	6217088;1304527	0.0057038	0.644883	1
TF	7018	transferrin	1	15909710	0.0050856	0.64781	3
BRCA2	675	breast cancer 2, early onset	1	19514598	0.0049223	0.648582	2
AMH	268	anti-Mullerian hormone	2	18054933;25171264	0.0047867	0.649223	0
B3GAT1	27087	beta-1,3-glucuronyltransferase 1 (glucuronosyltransferase P)	2	18688624;16635211	0.0047867	0.649223	0
CD1A	909	CD1a molecule	2	7720923;25305130	0.0047867	0.649223	0
CRISP3	10321	cysteine-rich secretory protein 3	2	19282327;21858178	0.0047867	0.649223	0
GNLY	10578	granulysin	2	14641912;20408833	0.0047867	0.649223	0
KRT20	54474	keratin 20	2	16635211;17141879	0.0047867	0.649223	0
KRT7	3855	keratin 7	2	26282852;16375819	0.0047867	0.649223	0
MYH11	4629	myosin, heavy chain 11, smooth muscle	2	11719740;10918100	0.0047867	0.649223	0
NAPEPLD	222236	N-acyl phosphatidylethanolamine phospholipase D	2	22489127;23372171	0.0047867	0.649223	0
FGB	2244	fibrinogen beta chain	1	18834350	0.0047059	0.649604	4
CYP11A1	1583	cytochrome P450, family 11, subfamily A, polypeptide 1	1	12858014	0.0045984	0.650111	2
HP	3240	haptoglobin	1	15909710	0.0044443	0.650838	1
NTRK2	4915	neurotrophic tyrosine kinase, receptor, type 2	1	21239439	0.0043727	0.651175	3
FASLG	356	Fas ligand (TNF superfamily, member 6)	1	20408833	0.0042557	0.651727	3
GAD2	2572	glutamate decarboxylase 2 (pancreatic islets and brain, 65kDa)	1	20599733	0.004206	0.651961	2
EIF4A2	1974	eukaryotic translation initiation factor 4A, isoform 2	1	22489127	0.0041011	0.652454	1
HSD17B1	3292	hydroxysteroid (17-beta) dehydrogenase 1	1	14698204	0.0037893	0.65392	1
IL11RA	3590	interleukin 11 receptor, alpha	1	15465850	0.0037814	0.653958	1
SFRP4	6424	secreted frizzled-related protein 4	1	21858178	0.003717	0.65426	1
LIN28	79727	lin-28 homolog (C. elegans)	1	24498170	0.0036907	0.654384	2
TG	7038	thyroglobulin	1	3308572	0.0036881	0.654396	1
IL33	90865	interleukin 33	1	18025098	0.0036295	0.654671	1
CRHR1	1394	corticotropin releasing hormone receptor 1	1	20978183	0.0035116	0.655224	1
LGALS1	3956	lectin, galactoside-binding, soluble, 1	1	26359845	0.0034899	0.655326	1
KLRC1	3821	killer cell lectin-like receptor subfamily C, member 1	1	20408833	0.0034541	0.655494	1
GDF15	9518	growth differentiation factor 15	1	23824055	0.0033917	0.655787	1
SELE	6401	selectin E	1	24790510	0.0033609	0.655931	2
IL3RA	3563	interleukin 3 receptor, alpha (low affinity)	1	21414667	0.0033149	0.656147	2
SPEN	23013	spen homolog, transcriptional regulator (Drosophila)	1	24427327	0.0032195	0.656594	1
WARS	7453	tryptophanyl-tRNA synthetase	1	15070879	0.0030932	0.657185	1
IFNB1	3456	interferon, beta 1, fibroblast	1	2115786	0.002852	0.658314	1
SPHK1	8877	sphingosine kinase 1	1	23881382	0.0028519	0.658314	1
FBN1	2200	fibrillin 1	1	9363728	0.0028443	0.65835	1
PZP	5858	pregnancy-zone protein	1	7882729	0.002824	0.658445	1
AMY2A	279	amylase, alpha 2A (pancreatic)	1	3875065	0.0023933	0.660456	0
AQP9	366	aquaporin 9	1	23238960	0.0023933	0.660456	0
CD27	939	CD27 molecule	1	15663603	0.0023933	0.660456	0
CGB1	114335	chorionic gonadotropin, beta polypeptide 1	1	16123088	0.0023933	0.660456	0
CGB2	114336	chorionic gonadotropin, beta polypeptide 2	1	16123088	0.0023933	0.660456	0
CGB5	93659	chorionic gonadotropin, beta polypeptide 5	1	16123088	0.0023933	0.660456	0
CGB7	94027	chorionic gonadotropin, beta polypeptide 7	1	16123088	0.0023933	0.660456	0
CGB8	94115	chorionic gonadotropin, beta polypeptide 8	1	16123088	0.0023933	0.660456	0
CHRNA4	1137	cholinergic receptor, nicotinic, alpha 4	1	22480510	0.0023933	0.660456	0
CSF1	1435	colony stimulating factor 1 (macrophage)	1	17664241	0.0023933	0.660456	0
DCLK3	85443	doublecortin-like kinase 3	1	23745703	0.0023933	0.660456	0
DEFB1	1672	defensin, beta 1	1	14641912	0.0023933	0.660456	0
ELN	2006	elastin	1	9363728	0.0023933	0.660456	0
GABBR1	2550	gamma-aminobutyric acid (GABA) B receptor, 1	1	20599733	0.0023933	0.660456	0
GJA5	2702	gap junction protein, alpha 5, 40kDa	1	12889991	0.0023933	0.660456	0
GUSB	2990	glucuronidase, beta	1	1304527	0.0023933	0.660456	0
GYPC	2995	glycophorin C (Gerbich blood group)	1	19383232	0.0023933	0.660456	0
HOXA10	3206	homeobox A10	1	15167850	0.0023933	0.660456	0
ISM2	145501	isthmin 2 homolog (zebrafish)	1	21142075	0.0023933	0.660456	0
LIN28B	389421	lin-28 homolog B (C. elegans)	1	24498170	0.0023933	0.660456	0
LPO	4025	lactoperoxidase	1	25388530	0.0023933	0.660456	0
MBL2	4153	mannose-binding lectin (protein C) 2, soluble (opsonic defect)	1	22019001	0.0023933	0.660456	0
MIB1	57534	mindbomb homolog 1 (Drosophila)	1	10486472	0.0023933	0.660456	0
MIR132	406921	microRNA 132	1	24498170	0.0023933	0.660456	0
MIR145	406937	microRNA 145	1	24498170	0.0023933	0.660456	0
MIR149	406941	microRNA 149	1	24427327	0.0023933	0.660456	0
MIR182	406958	microRNA 182	1	24427327	0.0023933	0.660456	0
MIR21	406991	microRNA 21	1	25772773	0.0023933	0.660456	0
MIR212	406994	microRNA 212	1	26377223	0.0023933	0.660456	0
MIR424	494336	microRNA 424	1	24427327	0.0023933	0.660456	0
MIR517A	574479	microRNA 517a	1	25772773	0.0023933	0.660456	0
MIR517C	574492	microRNA 517c	1	25772773	0.0023933	0.660456	0
MIR518B	574474	microRNA 518b	1	25772773	0.0023933	0.660456	0
MIRLET7I	406891	microRNA let-7i	1	24427327	0.0023933	0.660456	0
MS4A1	931	membrane-spanning 4-domains, subfamily A, member 1	1	8654630	0.0023933	0.660456	0
NEDD4	4734	neural precursor cell expressed, developmentally down-regulated 4	1	24427327	0.0023933	0.660456	0
ODF3	113746	outer dense fiber of sperm tails 3	1	23287699	0.0023933	0.660456	0
OVGP1	5016	oviductal glycoprotein 1, 120kDa	1	9341614	0.0023933	0.660456	0
PECAM1	5175	platelet/endothelial cell adhesion molecule	1	24427372	0.0023933	0.660456	0
PEPD	5184	peptidase D	1	23894889	0.0023933	0.660456	0
RFX2	5990	regulatory factor X, 2 (influences HLA class II expression)	1	23009827	0.0023933	0.660456	0
SCARA5	286133	scavenger receptor class A, member 5 (putative)	1	21858178	0.0023933	0.660456	0
SLC17A5	26503	solute carrier family 17 (anion/sugar transporter), member 5	1	26216093	0.0023933	0.660456	0
STMN1	3925	stathmin 1/oncoprotein 18	1	2559069	0.0023933	0.660456	0
TAF15	8148	TAF15 RNA polymerase II, TATA box binding protein (TBP)-associated factor, 68kDa	1	24427327	0.0023933	0.660456	0

## Sheet: Table S2
Table S2. Potential susceptibility genes for ectopic pregnancy.
Gene_Name	Number_of_connections_with_known_genes	Gene_ID	Gene_Description
GRB2	36	2885	growth factor receptor-bound protein 2
SHC1	35	6464	SHC (Src homology 2 domain containing) transforming protein 1
GSK3B	10	2932	glycogen synthase kinase 3 beta
CDK4	7	1019	cyclin-dependent kinase 4
GNRH1	7	2796	gonadotropin-releasing hormone 1 (luteinizing-releasing hormone)
GNRH2	7	2797	gonadotropin-releasing hormone 2
CDK6	6	1021	cyclin-dependent kinase 6
AXIN1	5	8312	axin 1
EIF4G3	4	8672	eukaryotic translation initiation factor 4 gamma, 3
EIF3B	3	8662	eukaryotic translation initiation factor 3, subunit B
